# Supplementary material
Source: publisher figshare collection journal article supplement (https://acs.figshare.com/ndownloader/files/12982709)
Supplement: Supplementary file 1 [file 12982709]

Archive with 3 entries (3 files):
- info.xml
- jz8b02127_high_quality.mp4
- jz8b02127.pdf
