# Supplementary material
Source: publisher figshare collection journal article supplement (https://acs.figshare.com/ndownloader/files/12982709)
Supplement: Supplementary file 1 [file 12982709 › info.xml]

<presentation>
	<article>
		<title>Template-Free Synthesis of High-Yield Fe-Doped Cesium Lead Halide Perovskite Ultralong Microwires with Enhanced Two-Photon Absorption</title>
		<doi>10.1021/acs.jpclett.8b02127</doi>
		<copyright>American Chemical Society</copyright>
		<narrator>Baohua Jia</narrator>
		<contact>Shuangyang Zou, Baohua Jia</contact>
		<contact-email>zoubs-001@163.com, bjia@swin.edu.au</contact-email>
		<author-list>
			<author>Bingsuo Zou</author>
		</author-list>
	</article>
	<slides height-width-ratio=".75">
		<slide audio-time="26">
			<subtitle/>
		</slide>
		<slide audio-time="138">
			<subtitle/>
		</slide>
		<slide audio-time="118">
			<subtitle/>
		</slide>
		<slide audio-time="181">
			<subtitle/>
		</slide>
		<slide audio-time="134">
			<subtitle/>
		</slide>
		<slide audio-time="89">
			<subtitle/>
		</slide>
	</slides>
	<audio duration="686"/>
</presentation>
